# Supplementary material for: Peptide microarrays for the discovery of bioactive surfaces that guide cellular processes: a single step azide–alkyne “click” chemistry approach
Source: Royal Society of Chemistry journal article supplement (doi:10.1039/c4tb00375f), 2014-01-01
Supplement: c4tb00375f1.pdf [file c4tb00375f1.pdf]

# Peptide microarrays for the discovery of bioactive surfaces that guide cellular processes: a single step azide-alkyne “click” chemistry approach

*Douglas Zhang and Kristopher A. Kilian\**

Department of Materials Science and Engineering, University of Illinois, Urbana-Champaign, Illinois 61801, United States

**Supporting Information.** HPLC traces of purified peptides; 10 day image demonstrating long term culture capabilities of spotted areas; and example of how surface coverage is quantified is provided. This material is available free of charge via the Internet at <http://pubs.acs.org>.

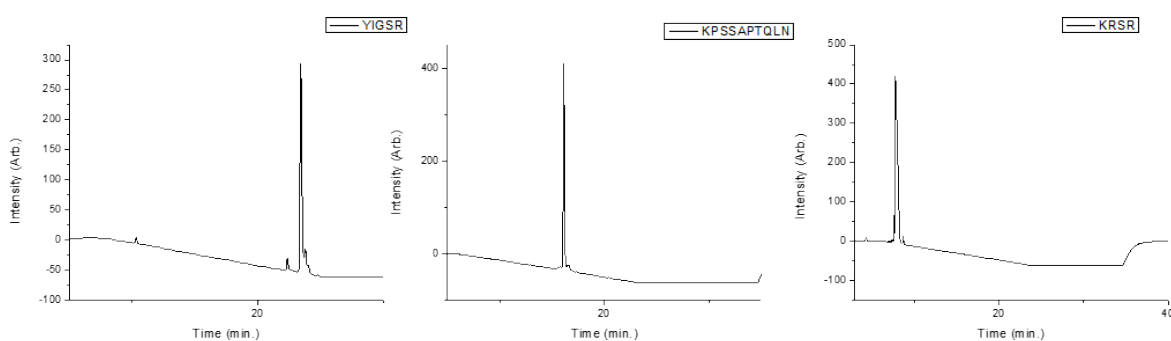

**Figure S1.** HPLC traces of alkyne-terminated peptides purified to >90.0%. A Waters XBridge BEH300 Prep C18 column was used with a flow rate of 2mL/min running a linear gradient from 2% Acetonitrile to 30% acetonitrile over the course of 30 min.

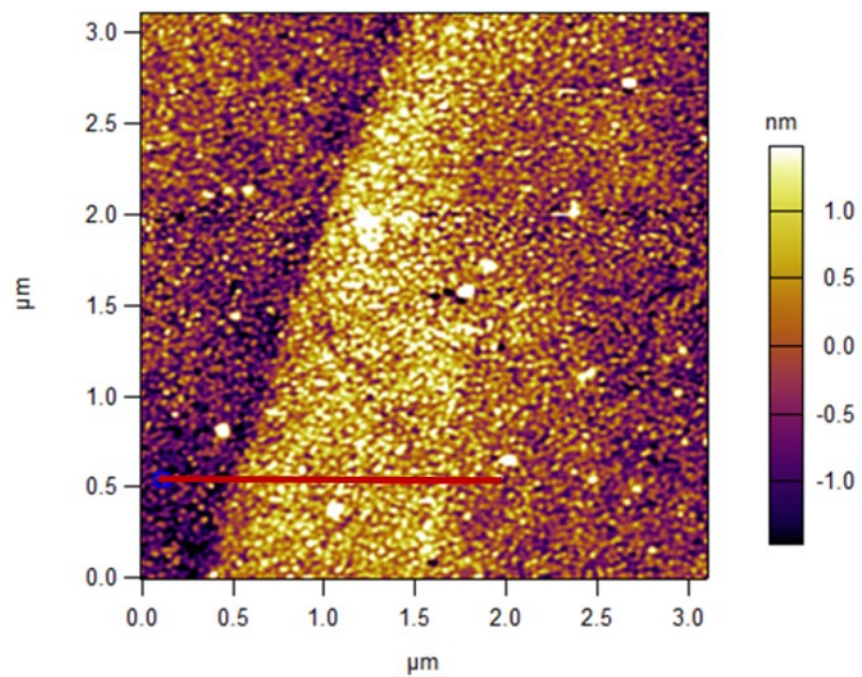

**Figure S2.** AFM measurement at the edge of a SAM formed by microarray spotting. The difference in height along the red line is approximately 1.5nm.

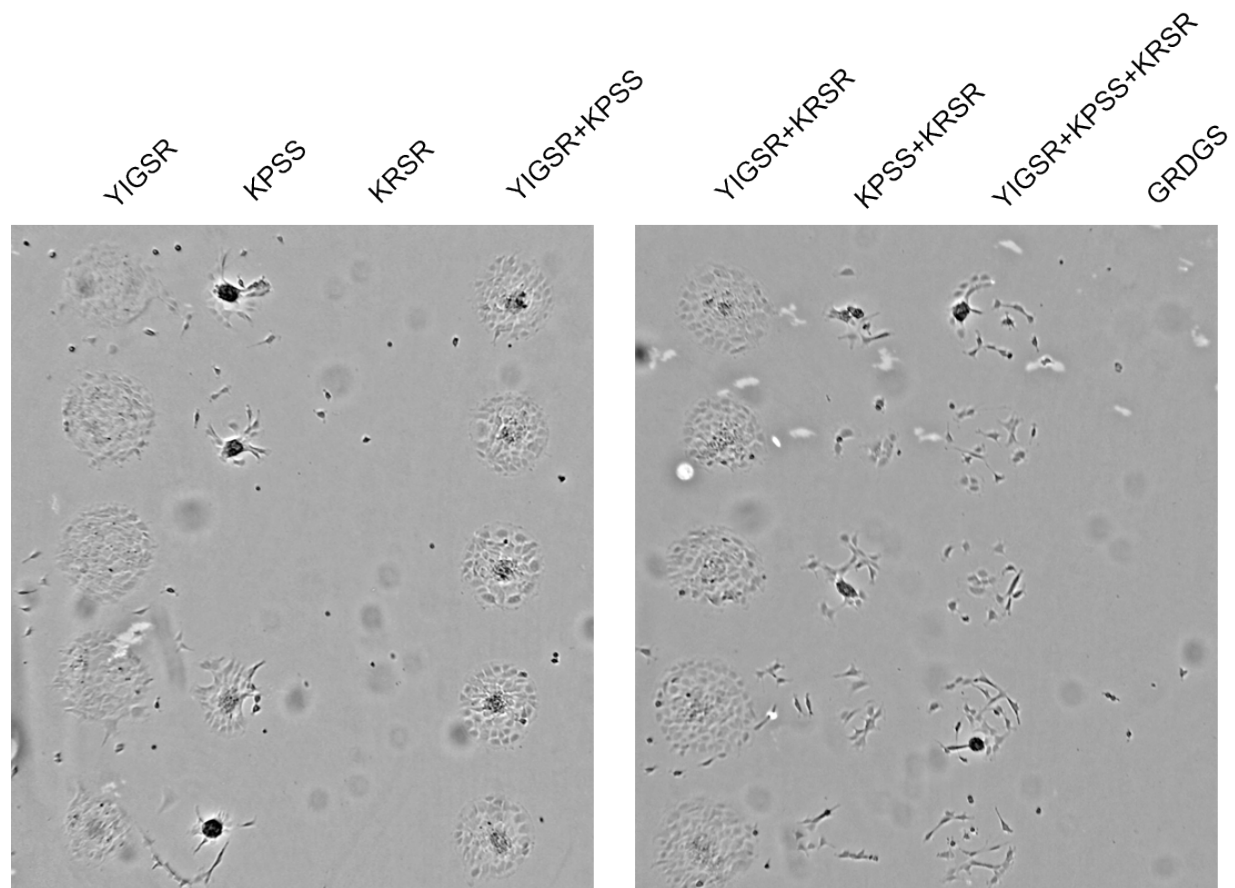

**Figure S3.** MEFs cultured on peptide combinations after 10 days in media still are localized to spotted regions and retain differential spreading properties on different peptides.

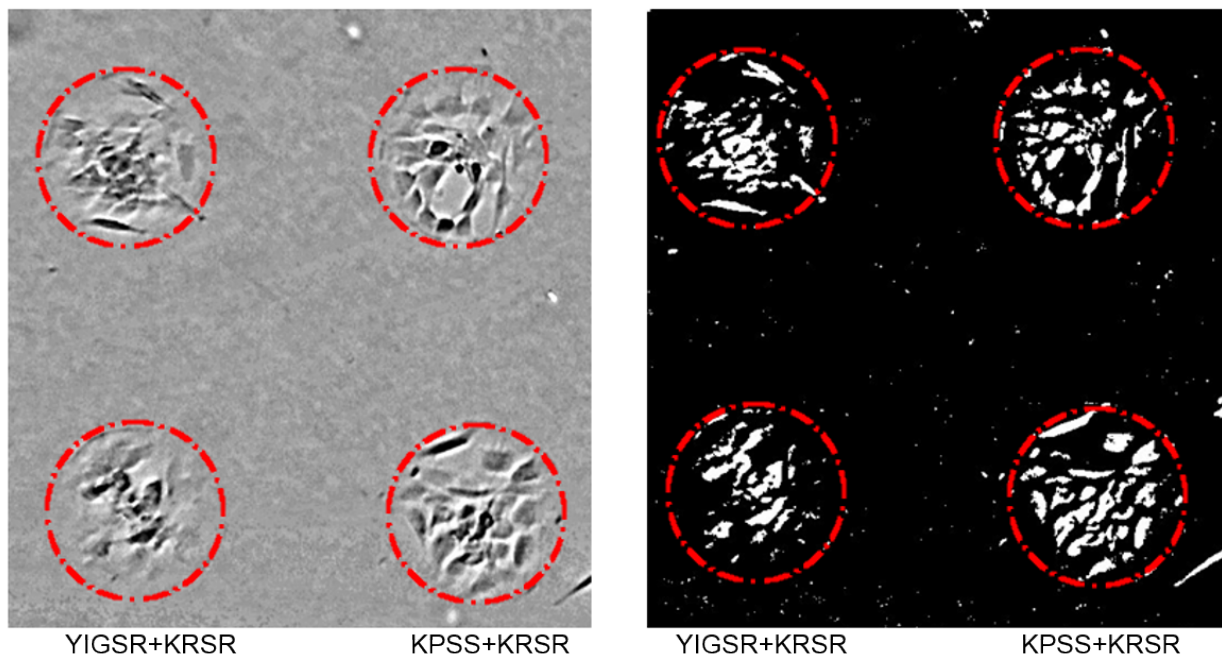

**Figure S4.** Quantification of ADSC surface coverage using ImageJ software.

Table S1. Ellipsometric measurements of SAM thicknesses

| <b>Surface</b> | <b>Thickness (nm)</b> |
|----------------|-----------------------|
| HS-C11-EG3     | $1.22 \pm 0.21$       |
| HS-C11-EG4-N3  | $1.49 \pm 0.21$       |
| Peptide        | $1.66 \pm 0.21$       |
